1 **Title: - Development of an imaging toolbox to assess the therapeutic potential and biodistribution of**  
2 **macrophages in a mouse model of multiple organ dysfunction**

3 **Authors: Jack Sharkey<sup>1,2</sup>, Lorenzo Ressel<sup>4</sup>, Nathalie Brilliant<sup>3</sup>, Bettina Wilm<sup>1,2</sup>, B. Kevin Park<sup>3</sup>, Patricia**  
4 **Murray<sup>1,2</sup>**

5 **Affiliation:**

6 <sup>1</sup>Department of Cellular and Molecular Physiology, University of Liverpool, <sup>2</sup>Centre for Preclinical  
7 Imaging, University of Liverpool, <sup>3</sup>Department of Molecular and Clinical Pharmacology, University of  
8 Edinburgh, <sup>4</sup>Department of Veterinary Pathology and Public Health, Institute of Veterinary Science,  
9 University of Liverpool, Liverpool, UK

10 **Abstract**

11 Cell-based regenerative medicine therapies require robust preclinical safety, efficacy, biodistribution  
12 and engraftment data prior to clinical testing. To address these challenges, we have developed an  
13 imaging toolbox comprising multi-spectral optoacoustic tomography and ultrasonography, which  
14 allows the degree of kidney, liver and cardiac injury and the extent of functional recovery to be  
15 assessed non-invasively in a mouse model of multi-organ dysfunction. This toolbox allowed us to  
16 determine the therapeutic effects of adoptively transferred M2 macrophages. Using bioluminescence  
17 imaging, we could then investigate the association between amelioration and biodistribution.  
18 Macrophage therapy improved kidney and liver function to a limited extent, but did not ameliorate  
19 histological damage. No improvement in cardiac function was observed. Biodistribution analysis  
20 showed that macrophages homed and persisted in the injured kidneys and liver, but did not populate  
21 the heart. Our data suggest that the limited improvement observed in kidney and liver function could  
22 be mediated by M2 macrophages.

23

24

25

26

27

28

29

## 30 **Introduction**

31 Cell-based regenerative medicine therapies (RMTs), which include pluripotent stem cells,  
32 mesenchymal stromal cells and macrophages, have the potential to treat a variety of human diseases.  
33 However, before these therapies can be routinely used in the clinic, accurate information regarding  
34 their safety and efficacy should be obtained from appropriate preclinical models. It is also important  
35 to gain an understanding of the therapeutic mechanisms of the RMTs, such as whether their ability to  
36 ameliorate injury is dependent on their engraftment in the damaged tissues. Issues which currently  
37 prevent the generation of such data include (i) the limitations associated with commonly used blood  
38 biomarkers of organ injury, such as serum creatinine (SCr) for renal function (Molitoris et al., 2007,  
39 Kellum et al., 2002, Ferguson et al., 2008, Chertow et al., 2005, Bonventre et al., 2010), and alanine  
40 aminotransferase for liver function (Vanderlinde, 1986, Ozer et al., 2010, Marrer and Dieterle, 2010);  
41 (ii) the technical limitations in repeated blood and urine sampling in small rodents; and (iii) the  
42 difficulties associated with monitoring organ function in small animal species longitudinally. The  
43 assessment of organ injury in small rodents classically involves measurements of serum or urine  
44 biomarkers, or histopathological analysis. Since the latter is usually only undertaken at post-mortem,  
45 it fails to allow the progression of injury to be monitored in the same animals longitudinally, requiring  
46 animals to be culled at multiple time points, which is not in keeping with NC3Rs' principles and also  
47 reduces the power of the statistical tests. Furthermore, current methods make it difficult to assess the  
48 safety, efficacy and therapeutic mechanisms of cell-based RMTs in comorbid conditions where more  
49 than one organ is affected, such as in the cardiorenal and hepatorenal syndromes (Mayfield et al.,  
50 2016, Gonzalez-Calero et al., 2014, Erly et al., 2015).

51 In this current study we set out to develop a multimodal imaging strategy to monitor the function of  
52 the liver, kidney and heart longitudinally in BALB/c mice in a single imaging session. We utilised  
53 multispectral optoacoustic tomography (MSOT) to assess kidney and liver function, and traditional  
54 ultrasound (US) measurements to assess cardiac function. MSOT is a technique which uses multiple  
55 excitation wavelengths to resolve specific sources of absorption, whether they are endogenous or  
56 exogenous (Taruttis et al., 2012). It relies on thermoelastic expansion which occurs when energy from  
57 a laser capable of emitting light at a range of wavelengths is absorbed by molecules within the tissues.  
58 This causes electrons to move to an excited state, generating heat and a resultant pressure wave  
59 which is detected by an ultrasound detector. The specific absorption profile of endogenous or  
60 exogenous molecules allows their identification within living animals in a minimally invasive manner  
61 (Comenge et al., 2018). We have previously described methods of monitoring kidney or liver function

62 using MSOT in models of chronic kidney injury and acute liver injury (Brillant et al., 2017, Scarfe et al.,  
63 2015).

64 Here, we utilised an acute model of adriamycin (ADR) - (doxorubicin-) induced multi-organ injury and  
65 assessed organ function on days one and four post drug administration in order to determine the  
66 extent of disease progression. ADR is an anthracycline antibiotic which is clinically administered as a  
67 chemotherapeutic agent; however, its use is limited predominantly due to cardiotoxicity mediated  
68 through a number of mechanisms. In rodents it can induce both chronic and acute kidney injury, as  
69 well as cardiac and hepatic dysfunction (Roomi et al., 2014, Saad et al., 2001, Scarfe et al., 2015).

70 To test the effectiveness of this MSOT-US bi-modal imaging strategy for monitoring the ameliorative  
71 potential of cell-based RMTs, after recording the extent of kidney, liver and cardiac dysfunction on  
72 day one, mouse bone marrow-derived alternatively activated (M2) macrophages (BMDMs) were  
73 administered intravenously into BALB/c mice and their ability to improve the function of the  
74 aforementioned organs was monitored on day four and compared with a saline placebo. M2 BMDMs  
75 were used in this study because previous reports have already demonstrated that they can ameliorate  
76 kidney injury, liver injury and cardiac injury (Wang et al., 2008, Bai et al., 2017, Shiraishi et al., 2016).  
77 However, as far as we are aware, M2 BMDMs have not previously been assessed for their ability to  
78 ameliorate the injury of multiple organs simultaneously. We then set out to assess the relationship  
79 between the biodistribution of the M2 BMDMs and their ability to ameliorate injury in each of the  
80 three organs by utilising bioluminescent imaging of M2 BMDMs expressing luciferase.

81

82

83

84

85

86

87

88

89

90

91 **Results**

92 Use of high frequency ultrasonography to investigate the effect of BMDMs on cardiac function in ADR-  
93 dosed mice

94 High frequency ultrasonography was used to determine whether cardiac function was affected in  
95 treated (ADR+BMDM), injured (ADR) and control mice (Fig 1) by measuring the following functional  
96 parameters: fractional shortening (FS), ejection fraction (EF), stroke volume (SV) and cardiac output  
97 (CO). The mean  $\Delta$ FS (Fig 2A) and  $\Delta$ EF (Fig 4B) was decreased in the ADR and ADR+BMDM groups when  
98 compared to uninjured controls, but not significantly so. However, there were significant changes in  
99  $\Delta$ CO (Fig 2C) and  $\Delta$ SV (Fig 2D), with both parameters being significantly reduced in the ADR and  
100 ADR+BMDM groups compared to healthy controls.

101 Use of MSOT to investigate the effect of BMDMs on renal function in ADR-dosed mice

102 MSOT was used to assess renal function in healthy mice, those which received ADR and those which  
103 received ADR+BMDMs, on days 1 and 4 following ADR administration (Fig 1). Uninjured control mice  
104 lost approximately 2.5% of their bodyweight over the 4 day time-course of the experiment whereas  
105 animals that received ADR lost approximately 18% of their bodyweight, irrespective of whether they  
106 were administered macrophages (Sup Fig 2, Table 1). Kidney function was assessed using MSOT, as  
107 previously described (Scarfe et al, 2015), to measure the renal clearance of the near infrared dye,  
108 IRDye 800 carboxylate (IRDye) which is exclusively filtered by the kidney (Sup Fig 1). Regions of interest  
109 were drawn around the cortico-medullary region and the renal pelvis to generate intensity data for  
110 quantitative measurements (Fig 3A). We observed that the typical clearance curves of IRDye on day 4  
111 in both cortex and pelvis were changed in animals with ADR-induced kidney injury when compared to  
112 those of healthy control mice (Fig. 3B, C). Specifically, instead of a single peak and subsequent decay  
113 in the cortex, the curve peaked, dropped but then rose again and slowly decreased over time. In the  
114 pelvis, a peak was observed at the same time point as in the cortex, followed by a second peak and  
115 subsequent rise in the signal intensity. The clearance kinetics of IRDye in mice after ADR injury and  
116 BMDM administration were also altered compared to the healthy controls (Fig 3D). To assess renal  
117 function we utilised the ratio of the AUC for the cortex and pelvis (AUC C:P) rather than the Tmax  
118 delay (difference in time at which signal was at maximum between cortex and pelvis) or cortex  
119 exponential decay time used previously (Scarfe et al, 2015). For quantitative analysis of the changes  
120 observed in each individual animal, IRDye clearance data were expressed as the difference in the AUC  
121 Cortex: Pelvis between the measurements taken on days 1 and 4 ( $\Delta$ AUC C:P). There was a significant  
122 increase in the  $\Delta$ AUC C:P between healthy and the ADR group, but not between healthy and the

123 ADR+BMDM group (Fig 3E). In addition, we assessed renal function using classical markers of blood  
124 urea nitrogen (BUN) and serum creatinine (SCr) on day 4 (Fig 3F, G respectively). BUN was significantly  
125 elevated in the ADR and ADR+BMDM groups compared to healthy controls, whereas there were no  
126 significant changes in SCr between all three treatment groups. Furthermore, there was a significant  
127 correlation between the AUC C:P and day 4 BUN measurements (Fig 3H,  $P=0.013$ ,  $R^2=0.39$ ).

#### 128 Use of MSOT to investigate the effect of BMDMs on hepatic function in ADR-dosed mice

129 We assessed liver function by measuring the clearance of indocyanine green (ICG) which is exclusively  
130 eliminated from blood by the liver using MSOT, as previously described (Brillant et al., 2017).  
131 Representative MSOT snap shot images illustrate the change in ICG signal in the ischiatic vessel (Fig  
132 4A). Plotting of the signal intensities over time showed that ICG clearance was delayed both in the  
133 ADR+BMDM and the ADR groups compared to the saline group (Fig 4 B-D). To investigate the  
134 ameliorative potential of BMDMs on liver function, we determined the change in AUC for ICG between  
135 days 1 and 4 in each individual mouse ( $\Delta$ ICG AUC) (Fig. 4E). There was a significant elevation in  $\Delta$ ICG  
136 AUC in the ADR group compared to healthy controls, but not between controls and ADR+BMDM  
137 groups, nor between the ADR and ADR+BMDM groups (Fig. 4E). Alanine aminotransferase (ALT) was  
138 significantly elevated in the sera of the ADR and ADR+BMDM groups compared to the controls on day  
139 4 (Fig. 4F), and correlated significantly with ICG AUC ( $P=0.0009$ ,  $R^2=0.59$ ) (Fig. 4G). To investigate the  
140 relationship between cardiac, kidney and liver injury, we plotted cardiac output together with the  
141 MSOT data for kidney and liver function on a 3-D graph. This shows the relationship between CO,  
142 kidney and liver function for each animal (Sup Fig 3).

#### 143 BMDMs failed to ameliorate ADR-induced histological damage in the kidney and liver

144 The functional data from the MSOT analyses suggested that BMDMs had a tendency to improve renal  
145 and hepatic function in ADR-dosed mice, but did not improve cardiac function. To investigate whether  
146 the apparent improvement in renal and hepatic function was associated with an amelioration of tissue  
147 damage, histological analysis of the liver and kidneys of mice was carried out at the study endpoint.  
148 Kidney sections were assessed for the presence of intratubular protein casts and flattened tubular  
149 epithelium, and liver sections for hepatocellular degeneration and necrosis. There was a significant  
150 difference between healthy and ADR injured animals, but in contrast to the functional data,  
151 administration of BMDMs failed to improve the extent of histological damage in the kidney or liver.  
152 Histologically, the kidneys of control mice showed no evidence of injury (Fig 5A) whereas kidneys of  
153 ADR mice had intratubular protein casts and flattening of tubular epithelial cells (Fig 5B, arrow)  
154 regardless of BMDM administration. Likewise, the livers of control mice showed no signs of injury (Fig

155 5C) whereas ADR and ADR+BMDM mice showed evidence of hepatocellular degeneration (Fig 5(1))  
156 and necrosis (Fig 5D(2)). Histological scoring in both the kidney and liver showed that control mice had  
157 no evidence of histological damage whereas both the ADR and ADR+BMDM groups showed varying  
158 degrees of injury (Fig 5E, F respectively).

159 Bioluminescence imaging shows that BMDMs accumulated in the kidneys and liver following ADR-  
160 induced injury, but not in the heart

161 In order to investigate the effect of organ injury on BMDM distribution, mice were imaged on the  
162 same day, or 3 days after administration of luciferase+ BMDMs, which corresponded to the 1<sup>st</sup> and 4<sup>th</sup>  
163 day following saline or ADR administration. Bioluminescence imaging showed that on day 1, cells were  
164 mostly in the lungs of both control and ADR animals. By day 4, BMDMs were no longer detectable in  
165 the controls, but had a widespread distribution in the ADR group (Fig 6A, B). Given the poor spatial  
166 resolution of bioluminescence imaging, it was not possible to determine which organs the BMDMs  
167 had populated in the ADR group at day 4. Therefore, immediately after in vivo imaging on day 1, three  
168 animals were immediately sacrificed to quantify the biodistribution of BMDMs in the major organs ex  
169 vivo, with the remaining three mice being sacrificed on day 4. Similarly to the in vivo data, ex vivo  
170 analysis of organs on day 1 showed no obvious difference between control and ADR mice, with most  
171 BMDMs being in the lungs, and some detected in the spleen (Fig. 6C, D). By day 4, BMDMs could only  
172 be detected in the lungs of control animals, but were present in the lungs, spleen, kidneys and liver of  
173 ADR animals. BMDMs were not detected in the hearts of control or ADR animals (Fig. 6E, F).

174 We measured the total flux from the individual organs ex vivo to quantify the differences in organ  
175 biodistribution between the treatment groups and time points (Fig. 7). The total flux from the heart,  
176 lungs and spleen decreased between days 1 and 4 in both the control and ADR mice (Fig 7A, B, C). The  
177 same trend was observed for the liver and kidney in the controls, with total flux decreasing between  
178 days 1 and 4. On the other hand, in the ADR mice, total flux increased significantly in the liver and  
179 kidneys between days 1 and 4 (Fig 7D, E).

180

181

182

183

184

185 **Discussion**

186 In the current investigation, cardiac function was measured by ultrasonography alongside hepatic and  
187 renal function by MSOT under the same anaesthesia session. This allowed us to determine the  
188 functions of 3 separate organs utilising a multimodal imaging approach. The cardiac measurements  
189 taken easily and quickly with the ultrasound software revealed that there were no significant changes  
190 in fractional shortening or ejection fraction between days 1 and 4 in the ADR and ADR+BMDM groups  
191 when compared to the healthy mice. However, significant decreases in cardiac output and stroke  
192 volume between days 1 and 4 were detected when comparing the saline treated mice to those which  
193 received adriamycin, regardless of the addition of the RMT. This suggests that a single dose of  
194 adriamycin significantly reduces cardiac function between days 1 and 4 of this study; however, the  
195 addition of BMDMs as a RMT show no beneficial effect on cardiac function.

196 We have previously used MSOT to monitor renal function in a mouse model of adriamycin-induced  
197 chronic kidney disease by measuring the clearance kinetics of IRDye (Scarfe et al., 2015). The two  
198 parameters used in this earlier study, which focussed on the chronic stage of renal injury, were the  
199 T<sub>max</sub> delay, and the exponential decay time of the IRDye in the renal cortex, which were measured at  
200 week 5 following ADR dosing, when the nadir of acute renal injury had passed. However, in the current  
201 study, which focussed on the acute phase of adriamycin-induced injury, these parameters were not  
202 appropriate because many animals did not display an IRDye 'peak' in the pelvis, nor an exponential  
203 decay in the renal cortex. Therefore, we considered that the most appropriate parameter in this case  
204 would be the ratio of the area under the curve (AUC) of the cortex and pelvis kinetic curves (AUC C:P),  
205 as this measurement reflects both impaired clearance through the cortex and delayed accumulation  
206 in the pelvis, and could be measured in all animals. A single dose of adriamycin caused a significant  
207 reduction in kidney function when compared to healthy mice over a 4 day period. Administration of  
208 M2 BMDMs 1 day after adriamycin administration resulted in a non-significant reduction in kidney  
209 function when compared to control mice. The AUC C:P showed a strong positive correlation with a  
210 more traditional biomarker of kidney injury, BUN, which reinforces the utility of AUC C:P as a measure  
211 of kidney function. There were, however, no differences between the mean BUN measurements in  
212 mice which received adriamycin alone and those which received adriamycin and M2 BMDMs. SCr was  
213 not significantly different between any of the groups, which highlights the lack of sensitivity of this  
214 biomarker for indicating renal function in rodents. Histological analyses of the kidneys showed  
215 evidence of intratubular protein casts and flattening of tubular epithelium in mice which received  
216 adriamycin, irrespective of whether they were administered BMDMs or not. Therefore, although  
217 MSOT showed that the M2 BMDMs appeared to cause a subtle improvement in renal function, there

218 was no corresponding improvement in histological damage or BUN levels. A study by Lu and colleagues  
219 had previously demonstrated that M2 macrophages reduce inflammatory infiltrates in adriamycin-  
220 induced nephropathy; however, macrophages were not administered until 5 days after adriamycin  
221 administration and biomarker analyses not carried out until day 28 (Lu et al., 2013). It is possible in  
222 this current study that analysis of kidney function at later time points than day 4 may have yielded  
223 more significant improvements in function. Wang and colleagues studied the effect of M0, M1 and  
224 M2 activated macrophages in a mouse model of chronic adriamycin nephropathy (Wang et al., 2007).  
225 These authors had found that by 4 weeks, M0 macrophages had no effect on renal injury, while M1  
226 macrophages promoted histological damage, and M2 macrophages significantly ameliorated tubular  
227 and glomerular injury (Wang et al., 2007). By contrast, we failed to observe any ameliorative effects  
228 of the M2 macrophages on tissue damage, but this may have been because our analysis was  
229 performed at 4 days, rather than at 4 weeks. Consistent with our current study, Wang and colleagues  
230 showed that M2 macrophages trafficked to inflamed kidneys. In addition, they provided evidence that  
231 the exogenous M2 macrophages ameliorate injury by reducing the infiltration of resident  
232 macrophages, thereby reducing inflammation.

233 In the current study the clearance of ICG from the blood of mice was used as a measure of liver  
234 function. ICG is a fluorescent cyanine dye which is used clinically in a number of diagnostic procedures  
235 including measurement of cardiac output, liver blood flow, ophthalmic angiography and hepatic  
236 function (Caesar et al., 1961, Okochi et al., 2002, Iijima et al., 1997). It absorbs in the near infrared  
237 region which makes it an ideal optoacoustic contrast agent. This, combined with the fact that ICG is  
238 microsomal metabolised in the liver and cleared through the hepatobiliary route make it an ideal  
239 agent for determination of liver function with MSOT. Using the ICG AUC we show here that there was  
240 no change in liver function in healthy mice between days 1 and 4 whereas mice which received  
241 adriamycin had a significantly decreased liver function in the same time window. Liver function was  
242 also decreased between days 1 and 4 in mice which received adriamycin and M2 BMDMs but not  
243 significantly so when compared to healthy mice. This suggests that a single high dose of adriamycin  
244 reduces liver function while the addition of M2 BMDMs has a beneficial effect on the function of the  
245 liver. The ICG AUC on day 4 of the study correlates strongly and significantly with serum ALT levels,  
246 reinforcing the utility of ICG AUC as a functional liver parameter. Histological analyses showed no  
247 evidence of liver injury in healthy mice while hepatocellular degeneration and necrosis was observed  
248 in all mice which received adriamycin. Again, much like the kidney histopathology and biomarker  
249 analysis, there were no differences in ALT or liver histology between mice which received adriamycin  
250 alone and those which received adriamycin and the M2 BMDMs. Previous work by Thomas and  
251 colleagues found that exogenous unpolarised BMDMs had a beneficial effect on mice with carbon



252 tetrachloride induced liver injury through the recruitment of MMP (matrix metalloproteinase)-  
253 producing host cells into the liver (Thomas et al., 2011). This in turn increased host macrophage  
254 recruitment and elevated IL-10 and MMP levels. The study also showed modest but significant  
255 increases in serum albumin, suggesting liver regeneration (Thomas et al., 2011). The results we  
256 present here also suggest a modest improvement in liver function as measured by MSOT, albeit  
257 insignificantly. It should be noted that the effect of M2 BMDMs on adriamycin-induced liver injury has  
258 not been previously investigated.

259 The aforementioned multimodal imaging strategy can monitor changes in the functions of the liver,  
260 kidney and heart, and identify potential efficacy of M2 BMDMs as a RMT. To investigate the  
261 relationship between biodistribution of the M2 BMDMs and any therapeutic effect, we administered  
262 M2 BMDMs expressing firefly luciferase which allowed the luminescent imaging and quantification of  
263 cells in the mice and organs (three on day 1 and three on day 4). At day 1, we observed no difference  
264 in luminescence distribution between both groups of mice, with signals only present in the lungs and  
265 spleen after IV cell administration. This pattern of biodistribution has been reported widely after IV  
266 administration of cells (Sharkey et al., 2016). However, on day 4 of the study the biodistribution of the  
267 cells in saline or adriamycin-dosed mice had changed dramatically. In the saline treated mice there  
268 remained only a weak luminescent signal in the lungs of the mice, indicating the cells rapidly die after  
269 IV administration. However, in mice which received adriamycin this was not the case; luminescence  
270 was detected over the whole body of the mouse when imaged *in vivo*, and in the liver, kidneys, lungs  
271 and spleen, but not the heart, when imaged *ex vivo*. While the luminescent signal intensity decreased  
272 from day 1 to 4 in the lungs and spleen, it was still observable. On the other hand, the signal intensity  
273 in the liver and kidneys was significantly elevated between days 1 and 4. Of note, the total flux in the  
274 whole body images on day 4 in ADR treated mice appeared greater than on day 1; however M2  
275 BMDMs do not have a great proliferative capacity so this was likely a result of the weight loss in the  
276 ADR treated mice causing less attenuation of light.

## 277 Summary

278 This investigation demonstrates that changes in the function of the liver, kidney and heart can be  
279 tracked over time in individual healthy animals and those that have received a single high dose of  
280 adriamycin. We show that these changes in liver and kidney function correlate well with traditional  
281 serum biomarkers of injury and show histological evidence of injury. We also show that the addition  
282 of M2 BMDMs improves kidney and liver function over the study as measured by MSOT. However  
283 neither biomarker nor histological analyses showed a reduction in the severity of injury. This may  
284 suggest that subtle changes in organ function can be detected using MSOT imaging prior to changes

285 in organ histopathology and accumulation of serum biomarkers. Therefore, MSOT allows the  
286 assessment of the efficacy of a potential RMT in mice without the need for repeated blood or urine  
287 sampling. Secondly this study demonstrates an imaging technique to monitor the biodistribution of  
288 M2 BMDMs in healthy animals and those with organ dysfunction. Unfortunately, to accurately assess  
289 the intra-organ biodistribution of M2 BMDMs, it is required that animals are sacrificed prior to  
290 imaging. We show that adriamycin affected the biodistribution of M2 BMDMs since mice with kidney  
291 and liver dysfunction demonstrated an increase in longevity and migration of the therapeutic cells to  
292 both organs, which incidentally also appeared to provided signs of efficacy in the functional study. No  
293 signs of efficacy were observed in the heart, which showed no evidence that BMDMs migrated  
294 towards it.

295 This current study describes and demonstrates an “imaging toolbox” to assess murine renal, hepatic  
296 and cardiac function in a minimally invasive manner using both MSOT and ultrasound in a single  
297 anaesthesia session. Comorbidities are common clinically so the ability to utilise an imaging toolbox  
298 to investigate the potential of regenerative therapies in preclinical species is crucial. This toolbox  
299 allows more accurate assessment of the efficacy of potential regenerative therapies than current  
300 histological and biomarker analyses as it allows the extent of the recovery to be measured in individual  
301 animals over time. Many regenerative therapies which show efficacy in preclinical species are not  
302 effective clinically which may be a result of improper methods to assess their efficacy in individual  
303 animals preclinically. This toolbox may allow more accurate assessment of efficacy and enable a more  
304 robust determination of the risk: benefit ratio of a potential regenerative therapy prior to clinical  
305 translation and therefore reduce the number of therapies that don’t show true efficacy that are tested  
306 in human patients. This toolbox also improves understanding of the mechanism in which cell therapies  
307 elicit efficacy through the study of their biodistribution. We can determine whether cells must reach  
308 the target organ and engraft to show efficacy, which is important for determining the optimal  
309 administration route.

310

311

312

313

314

315

## 316 **Materials and Methods**

### 317 Animals

318 Mice were purchased from Charles River, UK, and were housed with *ad libitum* access to food and  
319 water. All animal experiments were performed under a license granted under the Animals (Scientific  
320 Procedures) Act 1986 and were approved by the University of Liverpool ethics committee.  
321 Experiments are reported in line with the ARRIVE guidelines.

### 322 Primary macrophage isolation

323 Primary bone marrow derived macrophages (BMDMs) were prepared as previously described  
324 (Sharkey et al., 2017). Male BALB/c mice were used to isolate BMDMs for the efficacy study whereas  
325 for the biodistribution study, mice with a mixed background (L2G85 mice bred to wild type FVB mice)  
326 expressing the CAG-luc-eGFP L2G85 transgene were used (FVB-Tg(CAG-luc,-GFP)L2G85Chco/J).  
327 Briefly, femurs and tibias of mice (8-10 weeks) were harvested and muscle tissue removed from the  
328 bones in a sterile fume hood. Bone marrow was flushed from the bones using a sterile syringe with  
329 Dulbecco's Modified Eagle's Medium (DMEM): F12 cell culture medium (Gibco) supplemented with  
330 10 % foetal bovine serum 2mM glutamine and 1 x penicillin/streptomycin (Invitrogen). The bone  
331 marrow was suspended in the medium before being passed through a cell strainer (40 µm) and then  
332 cultured in DMEM: F12 media containing 20 ng/ml murine recombinant macrophage colony  
333 stimulating factor (MCSF-1). Bone marrow suspensions were cultured at 37 °C, 5 % CO<sub>2</sub> and medium  
334 was replaced every other day. On day 7, macrophages were considered fully differentiated as  
335 determined by the expression of both CD11b and F4/80 (Biolegend) by flow cytometry. Mature  
336 BMDMs were then polarised towards an M2-like phenotype by the overnight addition of recombinant  
337 murine interleukin (IL)-4 (20 ng/ml).

### 338 Induction of organ dysfunction

339 Male BALB/c mice (8 – 10 weeks) received either adriamycin (20 mg/kg, n=11) or saline (0.9 %, n=4)  
340 intra-peritoneally (IP) on day 0. Adriamycin (doxorubicin hydrochloride, Tocris Bioscience) was  
341 dissolved in warm saline (0.9 %) to make a stock solution (10 mg/ml) before administration. Mice were  
342 weighed on a daily basis to monitor their wellbeing and mice which received adriamycin were provided  
343 with a wet food diet.

### 344 Imaging protocol

345 Imaging was carried out on day 1 and 4 under the same imaging session and using the following  
346 protocol: Mice were anaesthetised and fur was removed from the torso by shaving and epilating. Mice

347 were then imaged by ultrasound to generate functional cardiac parameters. The tail veins of mice  
348 were then cannulated and mice moved to the MSOT system and received ICG (Carl Roth, Germany)  
349 for liver functional measurements. The catheter was flushed with saline before administration of  
350 IRDye800 carboxylate (LI-COR) for functional liver measurements. Mice were then allowed to recover  
351 in a heat box before being returned to their home cage. A schematic showing how the study was  
352 carried out can be found in Fig. 1. Results for MSOT and ultrasound analyses are expressed as the  
353 change in each parameter between days 1 and 4 in the study. Detailed descriptions of each imaging  
354 protocol are provided below.

#### 355 Assessment of cardiac function

356 Cardiac function was assessed using the Prospect 2.0 ultrasound system (S-Sharp, Taiwan). Mice were  
357 anaesthetised using isoflurane and oxygen and the mice were placed dorsally on a heated platform.  
358 Mice were fixed in place during imaging using surgical tape. Ultrasound gel was applied to the chest  
359 area of the mice and the ultrasound transducer positioned above the chest area. The following  
360 parameters were measured: epicardial area and endocardial area in the long axis view, left ventricle  
361 length, epicardial areas in the short axis view, M-mode images of both the long and short axis views  
362 in order to measure heart rate, left ventricular interior diameter and wall thickness in both diastole  
363 and systole. These parameters were used to calculate fractional shortening (FS), ejection fraction (EF),  
364 stroke volume (SV) and cardiac output (CO).

#### 365 Assessment of liver function

366 Liver function was assessed using the inVision 256-TF MSOT imaging system (iThera Medical, Munich).  
367 Immediately after assessment of cardiac function the mice were moved to the MSOT imaging system.  
368 Prior to being placed into the system the tail vein of the mice was cannulated to allow injection of the  
369 optical imaging contrast agents during photoacoustic imaging. Mice were placed in the system and  
370 allowed to acclimatise for 15 minutes prior to recording data. Imaging focussed on the ischiatic vessels  
371 close to the hips of the mice for detection of indocyanine green (ICG) and its subsequent clearance.  
372 The following parameters were used: an acquisition rate of 10 frames per second (consecutive frames  
373 averaged to minimise effects of respiration movement), with wavelengths of 700, 730, 760, 800, 850  
374 and 900 nm being recorded. Data were recorded for 3 minutes prior to intravenous (IV) injection of  
375 ICG (40 nmol, 100  $\mu$ l) over a 10 s period. Data were reconstructed using a model linear algorithm (View  
376 MSOT software) and multispectral processing using linear regression for ICG, deoxy- and oxy-  
377 haemoglobin spectra to resolve the signal for the ICG dye. Regions of interest drawn around the  
378 ischiatic vessels of each mouse were used to quantify the ICG dye signal (as mean pixel intensity) in

379 the vessels of the mice. These data were used to calculate the area under the clearance curve (AUC).  
380 Data expressed as the change in ICG AUC in each individual mouse between days 1 and 4 ( $\Delta$ ICG AUC).

#### 381 Assessment of kidney function

382 Kidney function was assessed utilising a similar method as the assessment of liver function. After liver  
383 function assessment, the catheter was flushed with a small amount of saline. Data were recorded  
384 using the following parameters: wavelengths of 775 and 850 nm and an acquisition rate of 10 frames  
385 per second (consecutive frames averaged). Imaging focussed on the centre of the right kidney of the  
386 mouse where the renal pelvis was visible. Data was recorded for 3 minutes prior to the injection  
387 through the tail vein catheter of IRDye 800 carboxylate (20 nmol, 100  $\mu$ l) over a period of 10 s. Data  
388 was reconstructed using a model linear algorithm and a difference protocol (775 nm – 850 nm) to  
389 resolve the signal for the IRDye 800 carboxylate. Regions of interest were drawn around the renal  
390 cortex and the renal papilla/pelvis region of the right kidney in each mouse to quantify the IRDye signal  
391 in the kidney. The mean pixel intensity data were used to calculate the AUC of both the renal cortex  
392 and papilla/pelvis. Data were expressed as the change in the ratio between the AUC of the cortex and  
393 the AUC of the pelvis regions between days 1 and 4 ( $\Delta$ AUC C:P).

#### 394 Therapeutic cell administration

395 M2-like primary BMDMs were administered to mice which received adriamycin (n=6) on day 1  
396 immediately after cardiac, hepatic and renal imaging. BMDMs were harvested from low adherence  
397 flasks (Corning) after maturation and polarisation by gentle agitation and scraping. Cells were then  
398 counted and suspended to a concentration of  $10^7$  cells/100  $\mu$ l saline. After mice were removed from  
399 the MSOT imaging system, 100  $\mu$ l of the cell suspension was administered via the tail vein cannula and  
400 mice were allowed to recover in a heat box before being returned to their home cage. Mice which did  
401 not receive BMDMs received 100  $\mu$ l saline via the tail vein catheter.

#### 402 Quantification of serum biomarkers

403 On day 4 mice were culled using an increasing concentration of CO<sub>2</sub> and exsanguinated by cardiac  
404 puncture. Blood was allowed to clot at room temperature before centrifugation to isolate the serum.

405 Blood urea nitrogen (BUN, QuantiChrom Urea Assay Kit, BioAssay Systems), serum creatinine (SCr,  
406 Serum Creatinine detection kit, ARBOR ASSAYS) and alanine aminotransferase activity (ALT, Thermo  
407 Fisher) were quantified according to manufacturer's instructions in a 96 well plate and were read using  
408 a FLUOstar Omega microplate reader (BMG LABTECH).

409

#### 410 Histopathological analysis

411 Kidney and liver tissues were fixed in 4 % paraformaldehyde (4 °C) for 24 hours before being washed  
412 in PBS, dehydrated with increasing concentrations of ethanol and subsequently embedded in paraffin.  
413 The kidneys were sectioned in order to obtain two symmetrical halves, to include the cortex, and  
414 medulla extending to the renal pelvis. For the liver, the large lobe was collected for analysis. Tissue  
415 sections were cut (5 µm) and were stained with haematoxylin and eosin (HE) and Periodic Acid Schiff  
416 (PAS) by standard methods. Kidney injury was scored 0-5 on 10 consecutive 200x microscopic fields in  
417 the outer stripe of the outer medulla and cortex on PAS stained slides adapting the method described  
418 from Wang and colleagues (Wang et al., 2005) . For liver, histological sections were assessed semi  
419 quantitatively for degeneration and necrosis following a semi quantitative scale representative for the  
420 section area involved (0=0%; 1=1-25%; 2=26-50%; 3=51-75%; 4=76-100%). Veterinary pathologist (LR) was  
421 blinded in regard to the experimental groups.

#### 422 Determining cellular biodistribution

423 To determine cellular biodistribution by bioluminescence imaging, male BALB/c mice (8 – 10 weeks)  
424 were used. The same adriamycin and macrophage dosing schedule was used as in the previous study:  
425 Mice received either 20 mg/kg adriamycin IP (n=6) or saline IP (n=6). 24 hours later all mice received  
426 IV injections of 10<sup>7</sup> PMDMs isolated from mice expressing the CAG-luc-eGFP L2G85 transgene. All mice  
427 received luciferin (1.5 mg/kg, IP) before being imaged using an IVIS Spectrum *in Vivo* Imaging System  
428 (Perkin Elmer). Mice were imaged in both dorsal and ventral positions using an automatic exposure  
429 time before being sacrificed. Organs were then dissected and imaged using the same protocol. The  
430 remaining mice were returned to their home cages until day 4 post adriamycin administration (the  
431 study end point) when they were imaged as previously described.

#### 432 Statistical analysis

433 Statistical analyses were carried out using Origin software. One-way ANOVA analysis was used for  
434 comparison of two groups and one-way ANOVA followed by Tukey analysis was used to compare  
435 multiple groups. Results were determined to be significant when  $P < 0.05$ . To assess whether  
436 correlations between results were significant Pearson's correlation coefficient was calculated.

437

#### 438 **Acknowledgements**

439 This work was supported by the UK Regenerative Medicine Platform Safety and Efficacy Hub (grant  
440 ref MR/K026739/1). The authors report no competing interests.

441 **References**

- 442 BAI, L., LIU, X., ZHENG, Q., KONG, M., ZHANG, X., HU, R., LOU, J., REN, F., CHEN, Y., ZHENG, S., LIU, S.,  
443 HAN, Y. P., DUAN, Z. & PANDOL, S. J. 2017. M2-like macrophages in the fibrotic liver protect  
444 mice against lethal insults through conferring apoptosis resistance to hepatocytes. *Sci Rep*, *7*,  
445 10518.
- 446 BONVENTRE, J. V., VAIDYA, V. S., SCHMOUDER, R., FEIG, P. & DIETERLE, F. 2010. Next-generation  
447 biomarkers for detecting kidney toxicity. *Nat Biotechnol*, *28*, 436-40.
- 448 BRILLANT, N., ELMASRY, M., BURTON, N. C., RODRIGUEZ, J. M., SHARKEY, J. W., FENWICK, S., POPTANI,  
449 H., KITTERINGHAM, N. R., GOLDRING, C. E., KIPAR, A., PARK, B. K. & ANTOINE, D. J. 2017.  
450 Dynamic and accurate assessment of acetaminophen-induced hepatotoxicity by integrated  
451 photoacoustic imaging and mechanistic biomarkers in vivo. *Toxicol Appl Pharmacol*, *332*, 64-  
452 74.
- 453 CAESAR, J., SHALDON, S., CHIANDUSSI, L., GUEVARA, L. & SHERLOCK, S. 1961. The use of indocyanine  
454 green in the measurement of hepatic blood flow and as a test of hepatic function. *Clin Sci*, *21*,  
455 43-57.
- 456 CHERTOW, G. M., BURDICK, E., HONOUR, M., BONVENTRE, J. V. & BATES, D. W. 2005. Acute kidney  
457 injury, mortality, length of stay, and costs in hospitalized patients. *J Am Soc Nephrol*, *16*, 3365-  
458 70.
- 459 COMENGE, J., SHARKEY, J., FRAGUEIRO, O., WILM, B., BRUST, M., MURRAY, P., LEVY, R. & PLAGGE, A.  
460 2018. Multimodal cell tracking from systemic administration to tumour growth by combining  
461 gold nanorods and reporter genes. *Elife*, *7*.
- 462 ERLY, B., CAREY, W. D., KAPOOR, B., MCKINNEY, J. M., TAM, M. & WANG, W. 2015. Hepatorenal  
463 Syndrome: A Review of Pathophysiology and Current Treatment Options. *Semin Intervent*  
464 *Radiol*, *32*, 445-54.
- 465 FERGUSON, M. A., VAIDYA, V. S. & BONVENTRE, J. V. 2008. Biomarkers of nephrotoxic acute kidney  
466 injury. *Toxicology*, *245*, 182-93.
- 467 GONZALEZ-CALERO, L., MARTIN-LORENZO, M. & ALVAREZ-LLAMAS, G. 2014. Exosomes: a potential  
468 key target in cardio-renal syndrome. *Front Immunol*, *5*, 465.
- 469 IJIMA, T., AOYAGI, T., IWAO, Y., MASUDA, J., FUSE, M., KOBAYASHI, N. & SANKAWA, H. 1997. Cardiac  
470 output and circulating blood volume analysis by pulse dye-densitometry. *J Clin Monit*, *13*, 81-  
471 9.
- 472 KELLUM, J. A., LEVIN, N., BOUMAN, C. & LAMEIRE, N. 2002. Developing a consensus classification  
473 system for acute renal failure. *Curr Opin Crit Care*, *8*, 509-14.
- 474 LU, J., CAO, Q., ZHENG, D., SUN, Y., WANG, C., YU, X., WANG, Y., LEE, V. W., ZHENG, G., TAN, T. K.,  
475 WANG, X., ALEXANDER, S. I., HARRIS, D. C. & WANG, Y. 2013. Discrete functions of M2a and  
476 M2c macrophage subsets determine their relative efficacy in treating chronic kidney disease.  
477 *Kidney Int*, *84*, 745-55.
- 478 MARRER, E. & DIETERLE, F. 2010. Impact of biomarker development on drug safety assessment.  
479 *Toxicol Appl Pharmacol*, *243*, 167-79.
- 480 MAYFIELD, A. E., FITZPATRICK, M. E., LATHAM, N., TILOKEE, E. L., VILLANUEVA, M., MOUNT, S., LAM,  
481 B. K., RUEL, M., STEWART, D. J. & DAVIS, D. R. 2016. The impact of patient co-morbidities on  
482 the regenerative capacity of cardiac explant-derived stem cells. *Stem Cell Res Ther*, *7*, 60.
- 483 MOLITORIS, B. A., LEVIN, A., WARNOCK, D. G., JOANNIDIS, M., MEHTA, R. L., KELLUM, J. A., RONCO,  
484 C., SHAH, S. & ACUTE KIDNEY INJURY, N. 2007. Improving outcomes from acute kidney injury.  
485 *J Am Soc Nephrol*, *18*, 1992-4.
- 486 OKOCHI, O., KANEKO, T., SUGIMOTO, H., INOUE, S., TAKEDA, S. & NAKAO, A. 2002. ICG pulse  
487 spectrophotometry for perioperative liver function in hepatectomy. *J Surg Res*, *103*, 109-13.
- 488 OZER, J. S., CHETTY, R., KENNA, G., PALANDRA, J., ZHANG, Y., LANEVSCHI, A., KOPPIKER, N.,  
489 SOUBERBIELLE, B. E. & RAMAIAH, S. K. 2010. Enhancing the utility of alanine aminotransferase

- 490 as a reference standard biomarker for drug-induced liver injury. *Regul Toxicol Pharmacol*, 56,  
491 237-46.
- 492 ROOMI, M. W., KALINOVSKY, T., ROOMI, N. W., RATH, M. & NIEDZWIECKI, A. 2014. Prevention of  
493 Adriamycin-induced hepatic and renal toxicity in male BALB/c mice by a nutrient mixture. *Exp*  
494 *Ther Med*, 7, 1040-1044.
- 495 SAAD, S. Y., NAJJAR, T. A. & AL-RIKABI, A. C. 2001. The preventive role of deferoxamine against acute  
496 doxorubicin-induced cardiac, renal and hepatic toxicity in rats. *Pharmacol Res*, 43, 211-8.
- 497 SCARFE, L., RAK-RASZEWSKA, A., GERACI, S., DARSSAN, D., SHARKEY, J., HUANG, J., BURTON, N. C.,  
498 MASON, D., RANJZAD, P., KENNY, S., GRETZ, N., LEVY, R., KEVIN PARK, B., GARCIA-FINANA, M.,  
499 WOLF, A. S., MURRAY, P. & WILM, B. 2015. Measures of kidney function by minimally  
500 invasive techniques correlate with histological glomerular damage in SCID mice with  
501 adriamycin-induced nephropathy. *Sci Rep*, 5, 13601.
- 502 SHARKEY, J., SCARFE, L., SANTERAMO, I., GARCIA-FINANA, M., PARK, B. K., POPTANI, H., WILM, B.,  
503 TAYLOR, A. & MURRAY, P. 2016. Imaging technologies for monitoring the safety, efficacy and  
504 mechanisms of action of cell-based regenerative medicine therapies in models of kidney  
505 disease. *Eur J Pharmacol*, 790, 74-82.
- 506 SHARKEY, J., STARKEY LEWIS, P. J., BARROW, M., ALWAHSH, S. M., NOBLE, J., LIVINGSTONE, E.,  
507 LENNEN, R. J., JANSEN, M. A., CARRION, J. G., LIPTROTT, N., FORBES, S., ADAMS, D. J.,  
508 CHADWICK, A. E., FORBES, S. J., MURRAY, P., ROSSEINSKY, M. J., GOLDRING, C. E. & PARK, B.  
509 K. 2017. Functionalized superparamagnetic iron oxide nanoparticles provide highly efficient  
510 iron-labeling in macrophages for magnetic resonance-based detection in vivo. *Cytotherapy*,  
511 19, 555-569.
- 512 SHIRAISHI, M., SHINTANI, Y., SHINTANI, Y., ISHIDA, H., SABA, R., YAMAGUCHI, A., ADACHI, H., YASHIRO,  
513 K. & SUZUKI, K. 2016. Alternatively activated macrophages determine repair of the infarcted  
514 adult murine heart. *J Clin Invest*, 126, 2151-66.
- 515 TARUTTIS, A., MORSCHER, S., BURTON, N. C., RAZANSKY, D. & NTZIACHRISTOS, V. 2012. Fast  
516 multispectral optoacoustic tomography (MSOT) for dynamic imaging of pharmacokinetics and  
517 biodistribution in multiple organs. *PLoS One*, 7, e30491.
- 518 THOMAS, J. A., POPE, C., WOJTACHA, D., ROBSON, A. J., GORDON-WALKER, T. T., HARTLAND, S.,  
519 RAMACHANDRAN, P., VAN DEEMTER, M., HUME, D. A., IREDALE, J. P. & FORBES, S. J. 2011.  
520 Macrophage therapy for murine liver fibrosis recruits host effector cells improving fibrosis,  
521 regeneration, and function. *Hepatology*, 53, 2003-15.
- 522 VANDERLINDE, R. E. 1986. Review of pyridoxal phosphate and the transaminases in liver disease. *Ann*  
523 *Clin Lab Sci*, 16, 79-93.
- 524 WANG, W., FAUBEL, S., LJUBANOVIC, D., MITRA, A., FALK, S. A., KIM, J., TAO, Y., SOLOVIEV, A.,  
525 REZNIKOV, L. L., DINARELLO, C. A., SCHRIER, R. W. & EDELSTEIN, C. L. 2005. Endotoxemic acute  
526 renal failure is attenuated in caspase-1-deficient mice. *Am J Physiol Renal Physiol*, 288, F997-  
527 1004.
- 528 WANG, Y., WANG, Y., CAO, Q., ZHENG, G., LEE, V. W., ZHENG, D., LI, X., TAN, T. K. & HARRIS, D. C. 2008.  
529 By homing to the kidney, activated macrophages potentially exacerbate renal injury. *Am J*  
530 *Pathol*, 172, 1491-9.
- 531 WANG, Y., WANG, Y. P., ZHENG, G., LEE, V. W., OUYANG, L., CHANG, D. H., MAHAJAN, D., COOMBS, J.,  
532 WANG, Y. M., ALEXANDER, S. I. & HARRIS, D. C. 2007. Ex vivo programmed macrophages  
533 ameliorate experimental chronic inflammatory renal disease. *Kidney Int*, 72, 290-9.

534

535

536

537



538 **Figures**

539

540

541

542

543

544

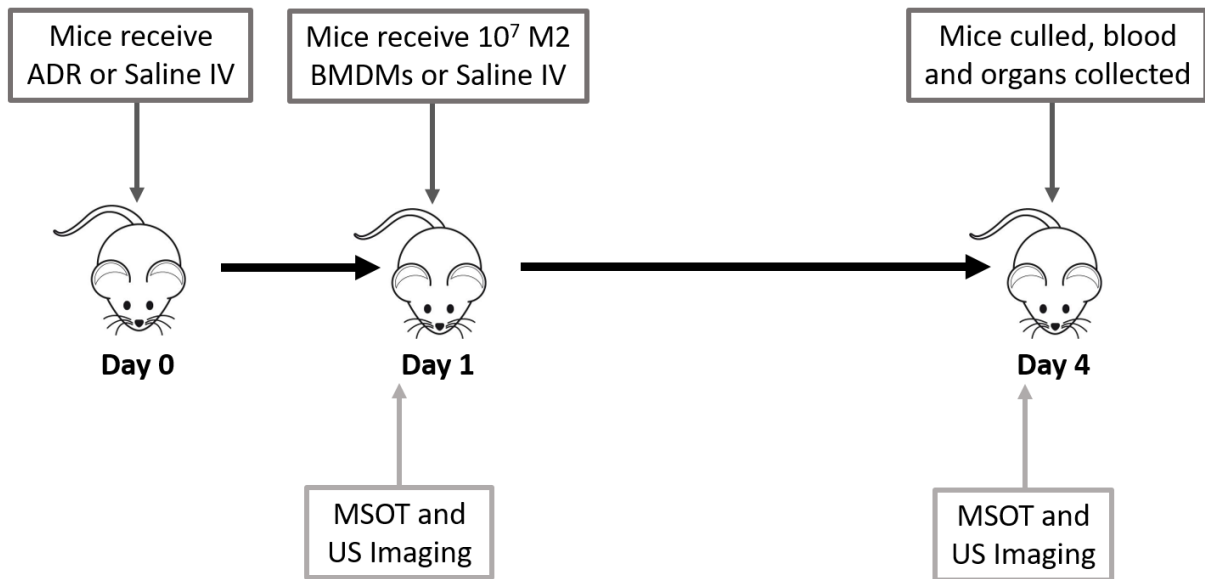

545

546 **Figure 1:-** Schematic showing the experimental protocol.

547

548

549

550

551

552

553

554

555

556

557

558

559

560

561

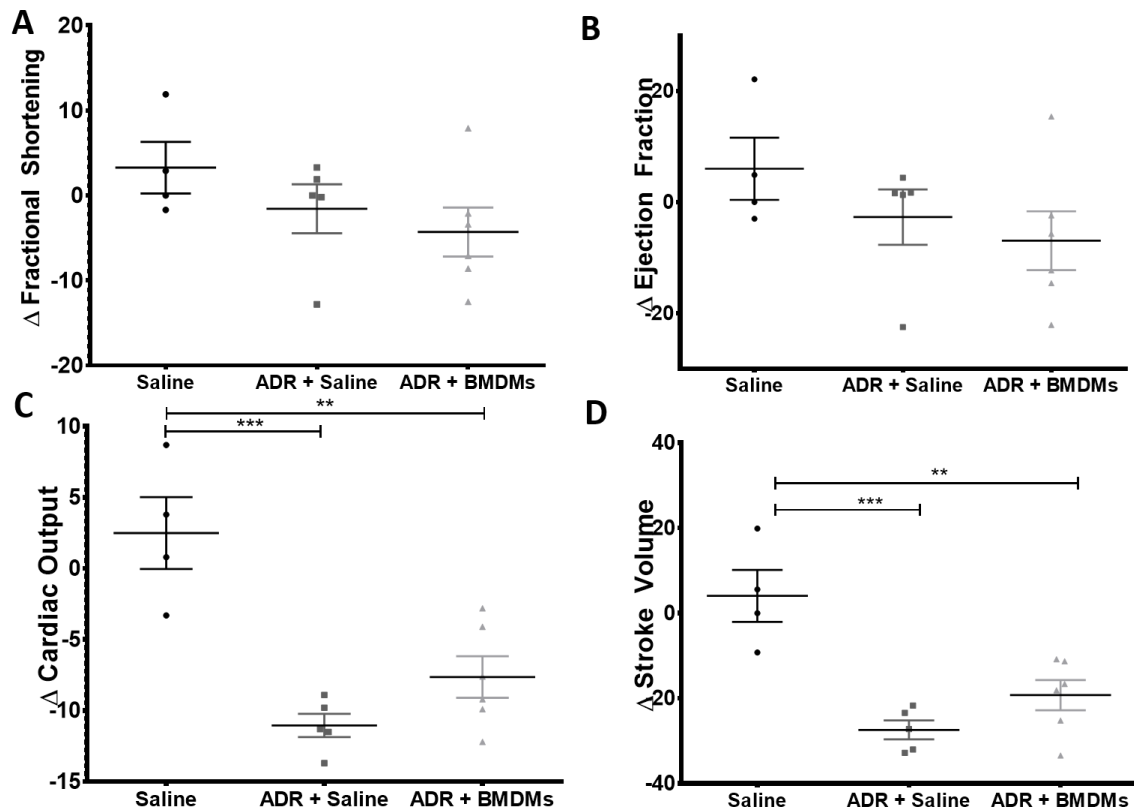

562

563 **Figure 2:-** Cardiac parameters as measured by ultrasound. Fractional shortening (A), ejection fraction  
564 (B), cardiac output (C) and stroke volume (D) were quantified. Each parameter is represented as the  
565 change in the parameter between days 1 and 4 in each mouse. Each data point represents an  
566 individual mouse. \*\* P<0.01, \*\*\* P<0.001.

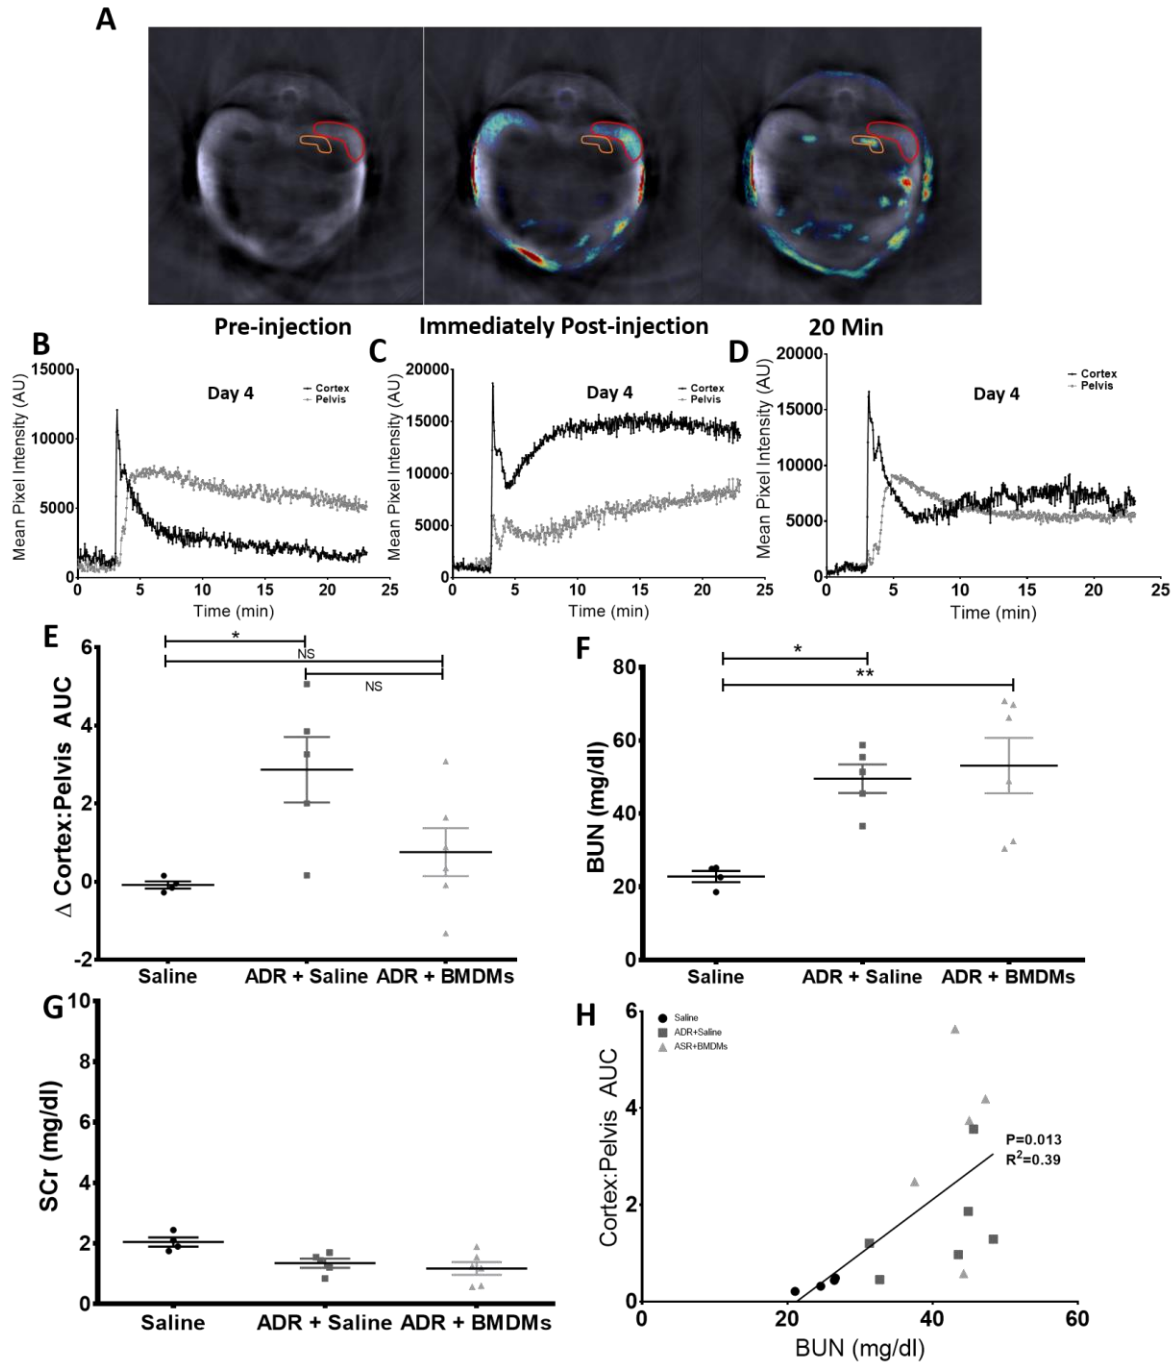

567

568 **Figure 3:-** Representative images showing the a typical cross section of a mouse as obtained by the  
 569 MSOT prior to, immediately post and 20 minutes post IRDye administration, Cortex and medullary  
 570 regions of interest are shown (A). Clearance kinetics on day 4 of IRDye 800 carboxylate from both the  
 571 kidney cortex and pelvis regions of interest in a typical healthy (B), ADR treated (C) and ADR+BMDM  
 572 treated mouse (D). The change in the mean cortex:pelvis AUC between days 1 and 4 in all mice is  
 573 shown in (E) (Mean  $\Delta$ AUC C:P -0.085, 0.755 and 2.866). Serum BUN (F) (mean 24.7, 43.4 and 41.1  
 574 mg/dl) and SCr (G) levels were quantified on day 4 in each mouse. The correlation between the  
 575 cortex:pelvis AUC and blood urea nitrogen on day four is shown in (H). Each data point represents an  
 576 individual mouse. \* P<0.05, \*\* P<0.01

577

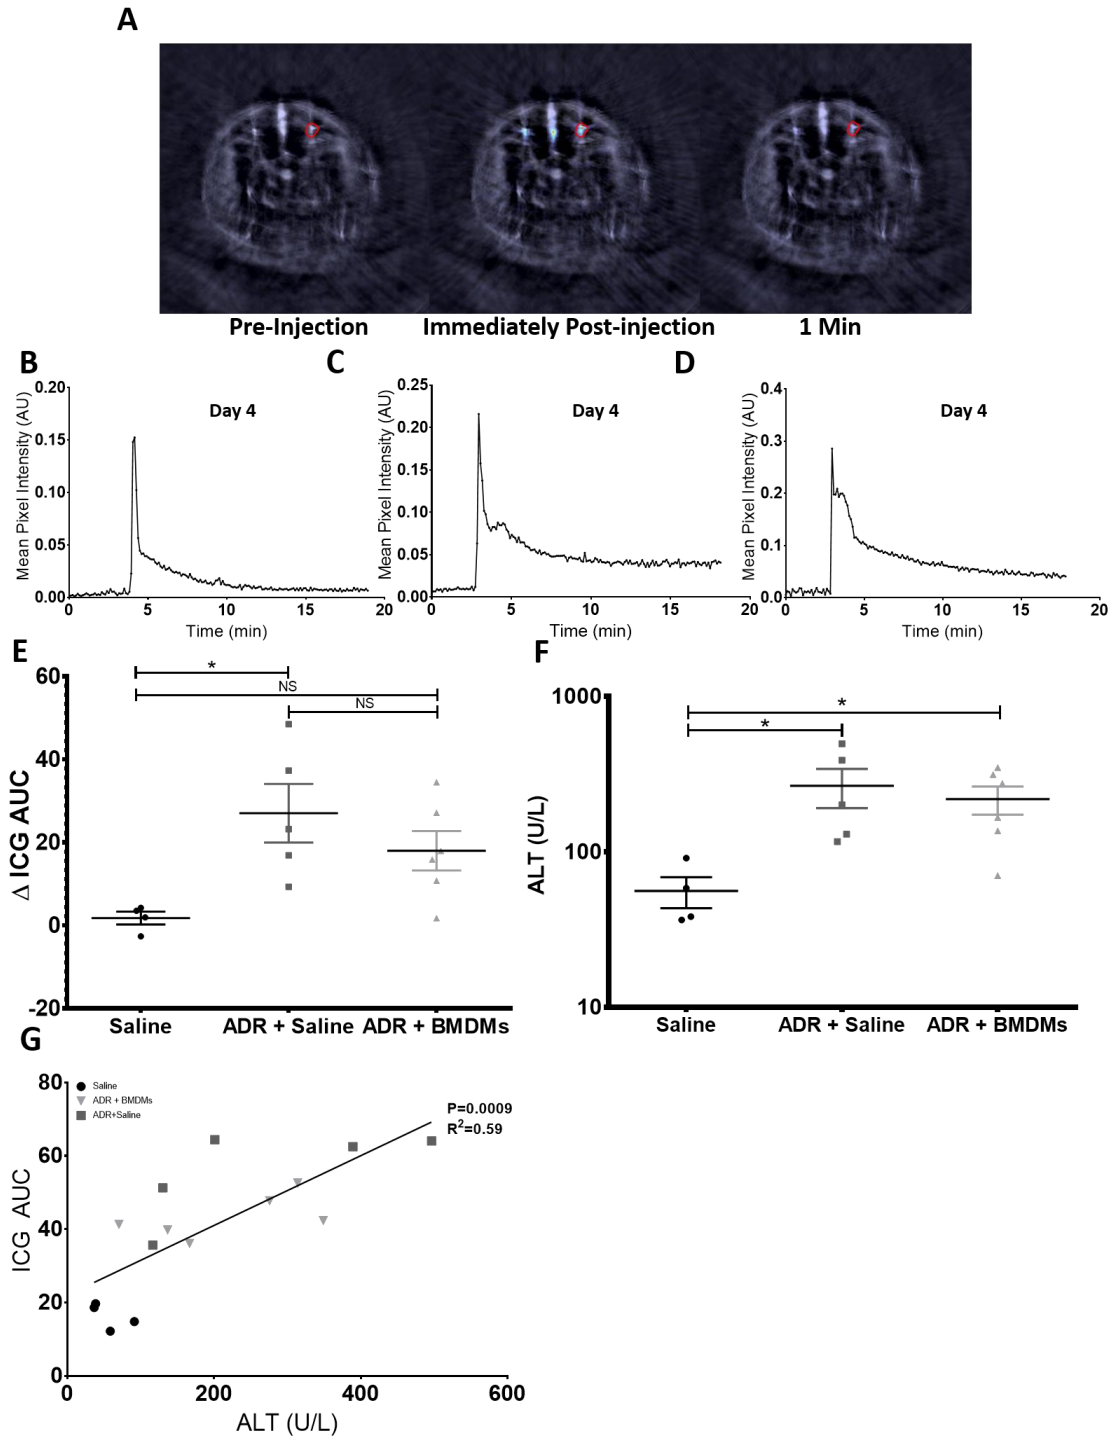

578

579 **Figure 4:-** Representative images showing the a typical cross section of a mouse as obtained by the  
580 MSOT both prior to, immediately post and 1 minute post ICG administration (A). Clearance kinetics on  
581 day 4 of ICG from a typical healthy mouse (B), an ADR treated mouse (C) and an ADR+BMDM mouse  
582 (D) from a single ischiatic vessel's region of interest. Clearance kinetics on day 4 of ICG from a mouse  
583 which had received adriamycin from a single ischiatic vessel (C). The change in the mean ICG AUC  
584 between days 1 and 4 in all mice is shown in (E) (Mean  $\Delta$ AUC ICG 1.8,  $\Delta$ AUC ICG 18). Serum ALT was  
585 quantified in all mice on day 4 (F). The correlation between the ICG AUC and alanine aminotransferase  
586 on day four is shown in (G) (mean 56.1, 218.6 and 266.6 U/L). Each data point represents an individual  
587 mouse. \*  $P<0.05$ .

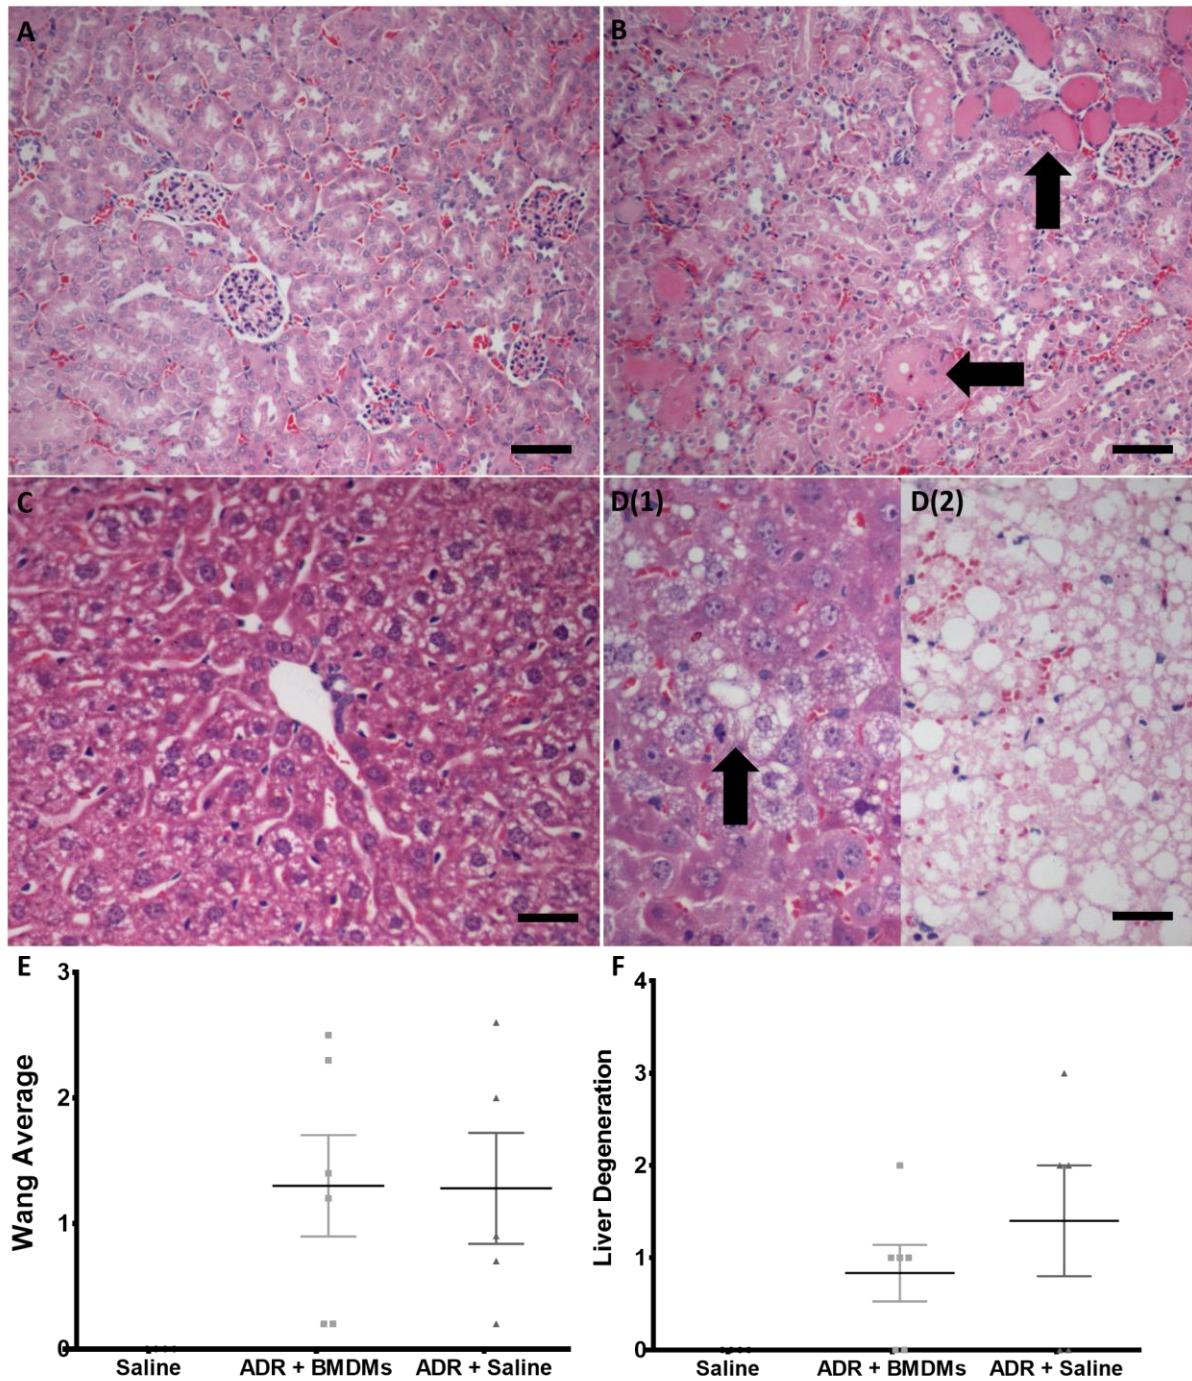

588

589 **Figure 5:-** Histological analyses from both the kidney and liver. Histological analyses show sections  
590 from typical sections of a kidney from a healthy mouse (A), the kidney of a mouse which had received  
591 adriamycin (B), the liver of a healthy mouse (C) and the liver of a mouse which had received adriamycin  
592 (D1, 2). All organs were collected on day 4 of the study and were stained with haematoxylin and eosin.  
593 (A) and (B); scale bar = 100  $\mu$ m. (C) and (D); scale bar = 50  $\mu$ m. No evidence of injury are observed in  
594 (A) or (C). (B) shows evidence of intratubular protein casts and flattening of the tubular epithelium  
595 (arrow). (D1) shows evidence of hepatocellular degeneration (arrow) and (D2) shows evidence of  
596 necrosis with evidence of pale eosinophilic substance. Histological scoring for the kidney and liver are  
597 shown (E, F respectively). Each data point represents an individual animal.

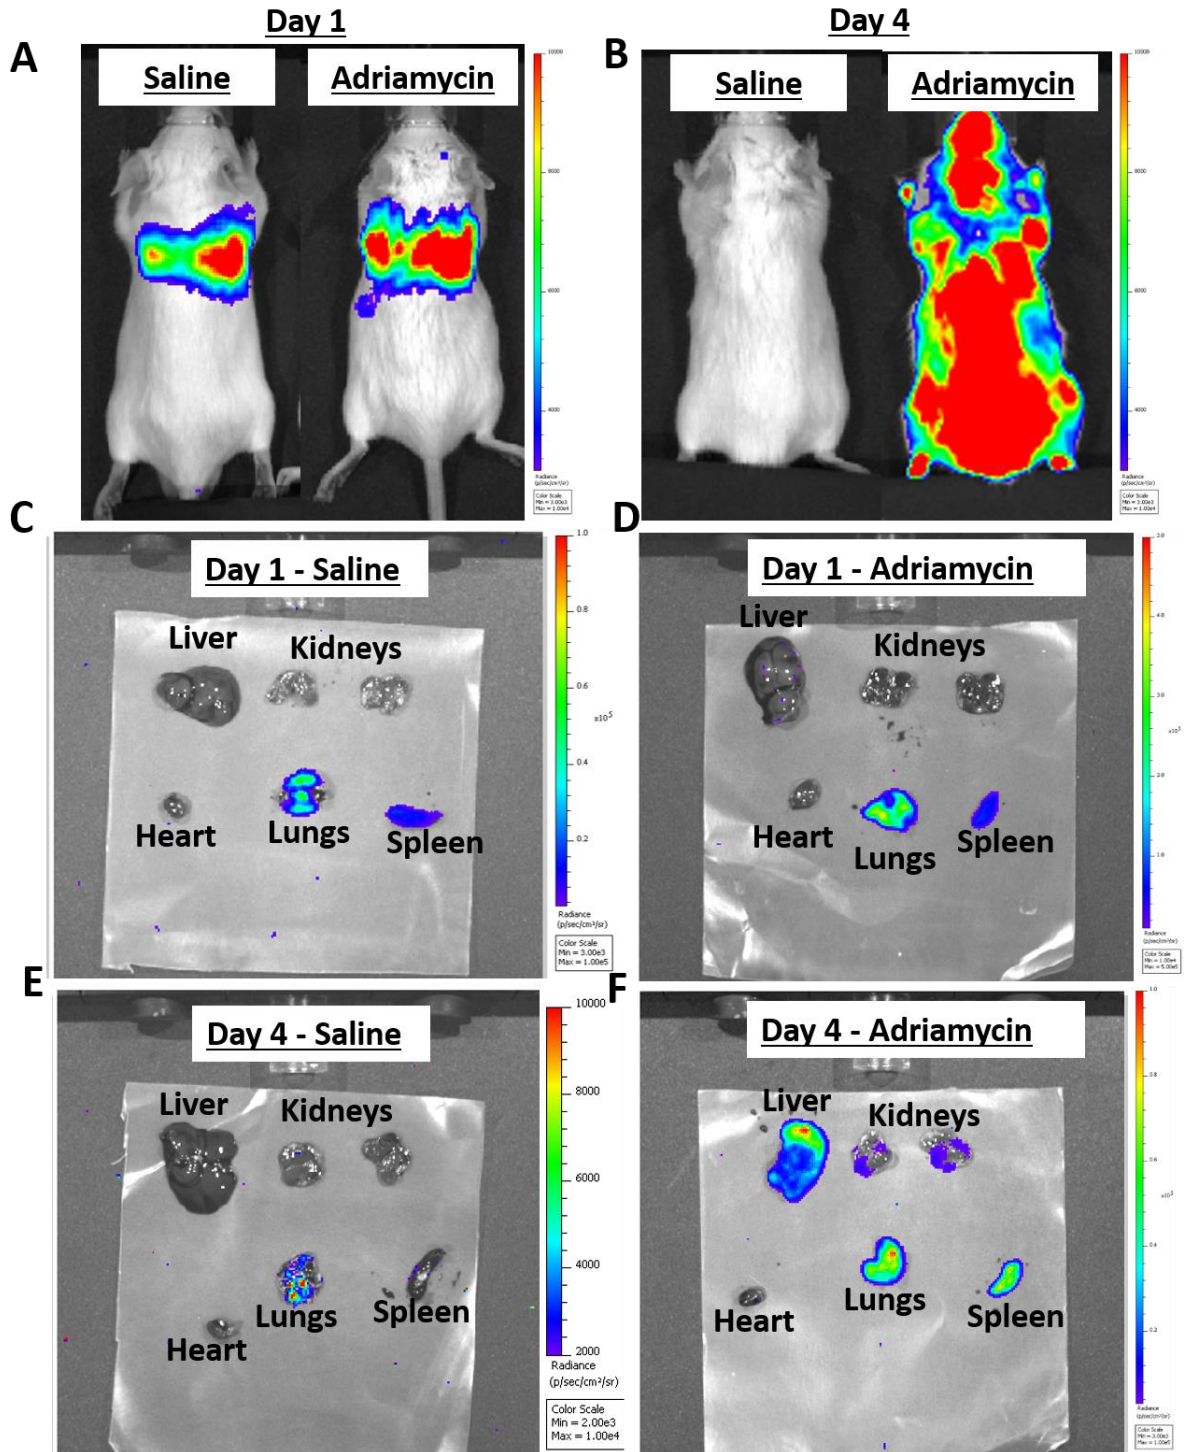

598

599 **Figure 6:-** All mice received  $10^7$  primary bone marrow derived macrophages which expressed  
600 luciferase via tail vein administration. Whole body images of typical mice treated with either saline or  
601 Adriamycin on both days 1 (A) and 4 (B). Ex vivo bioluminescence images from typical saline (C, E) and  
602 Adriamycin (D, F) treated mice on both days 1 (C, D) and 4 (E, F). Individual scales are shown on the  
603 right of each image. Each image shows the liver, kidneys, heart, lungs and spleen from an individual  
604 mouse. Scales for all ex vivo images are identical, as are scales for all whole body images.

605

606  
607  
608  
609

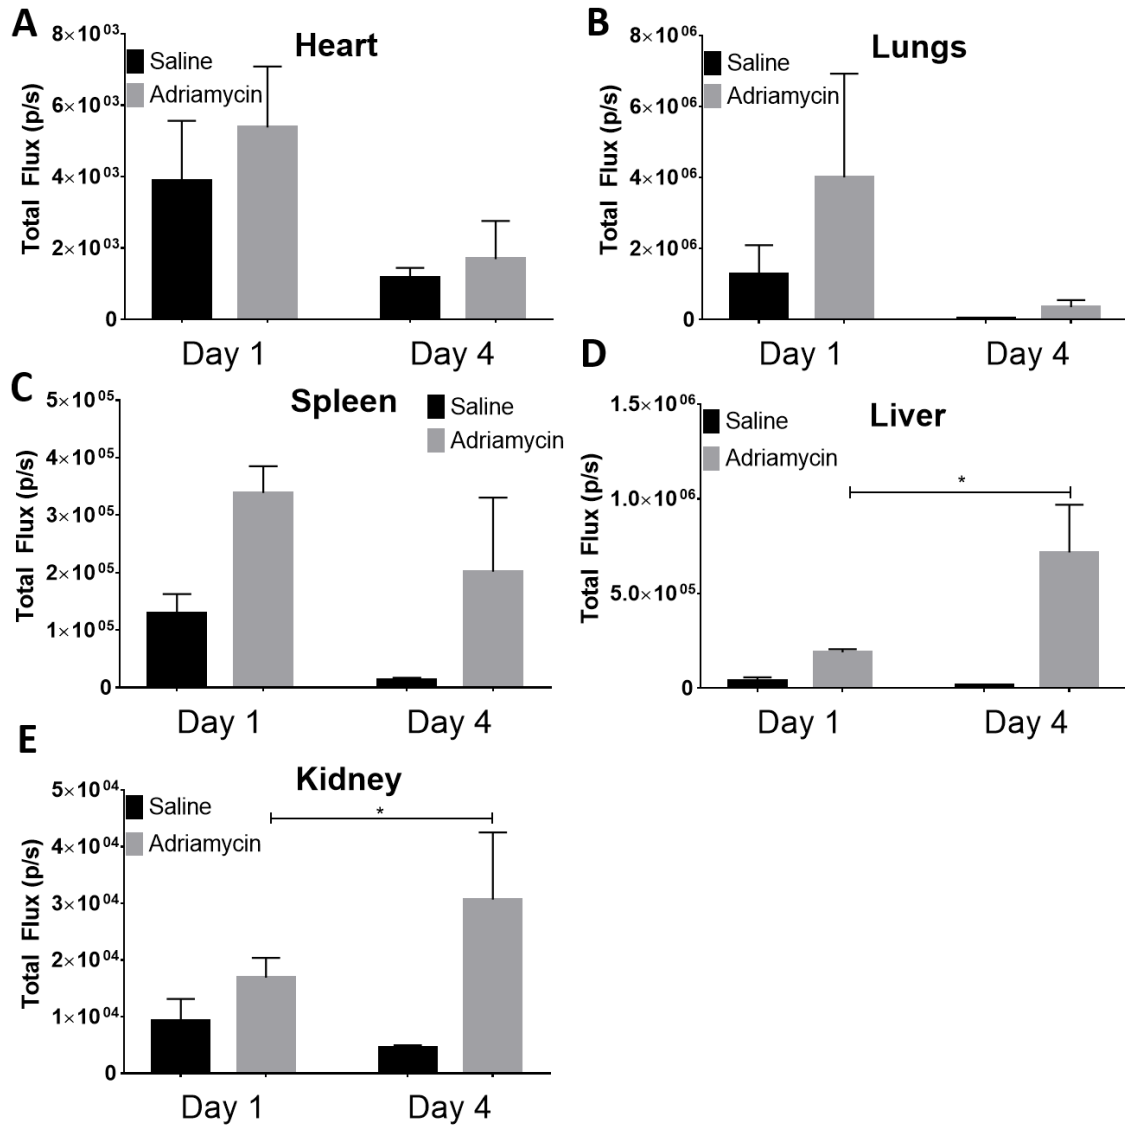

610  
611  
612  
613  
614  
615  
616  
617

**Figure 7:-** Quantified ex vivo bioluminescent results from organs of mice that received either saline on Adriamycin on both days 1 and 4. Data is shown for the heart (A), the lungs (B), the spleen (C), the liver (D) and the mean of both kidneys (E). Each bar represents the mean of 3 individual animals. \* P<0.05

618  
619  
620  
621  
622  
623  
624  
625  
626  
627

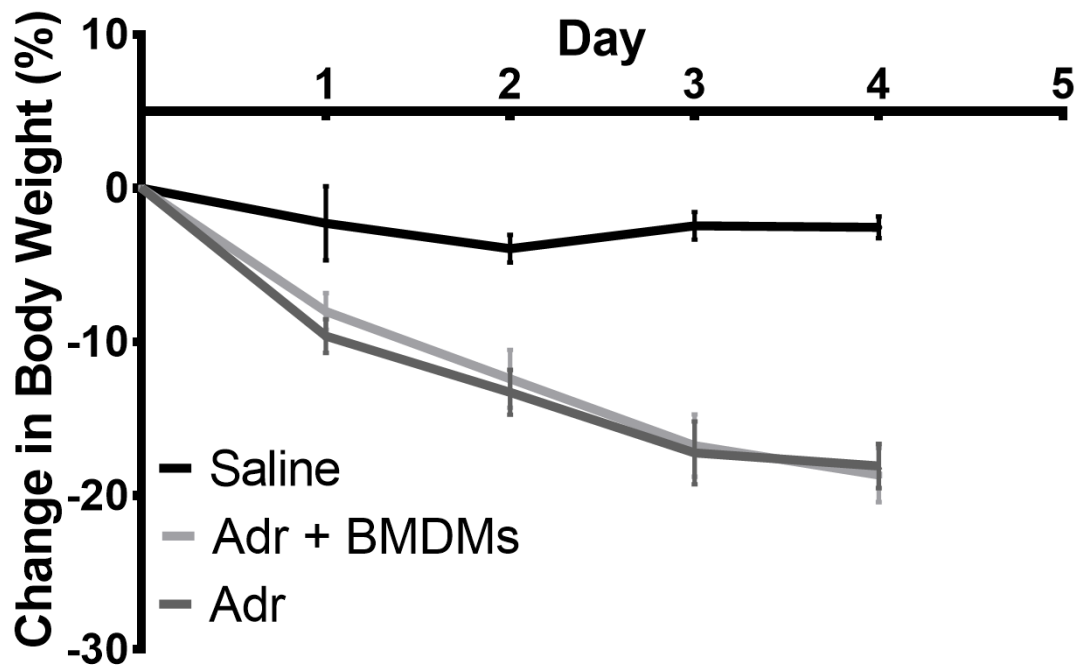

628

629 **Supplementary figure 1:-** Change in body weight in mice which received saline, ADR+BMDMs and  
630 ADR. Each data point represents the mean of mice within the group

631

632

633

634

635



636  
637  
638  
639  
640  
641  
642  
643

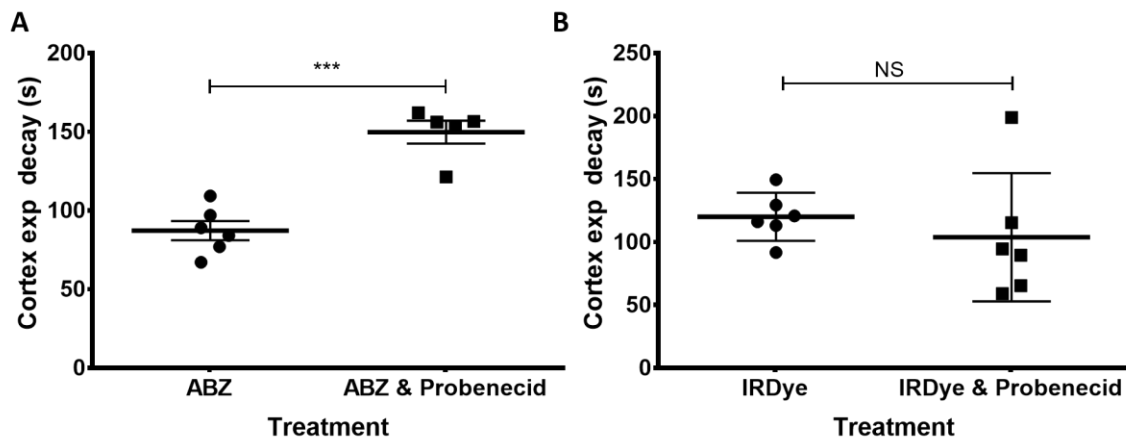

644  
645  
646  
647  
648  
649  
650  
651  
652  
653  
654  
655  
656  
657

**Supplementary figure 2:-** The effect of 50 mg/kg Probenecid on the clearance of two near infrared dyes through the cortex of the kidneys of mice as measured by MSOT. Results are expressed as the exponential decay time (s) of each dye from the cortex of the mice. Each data point represents an individual animal. NS = non-significant, \*\*\* P=0.001.

658  
659  
660  
661  
662  
663

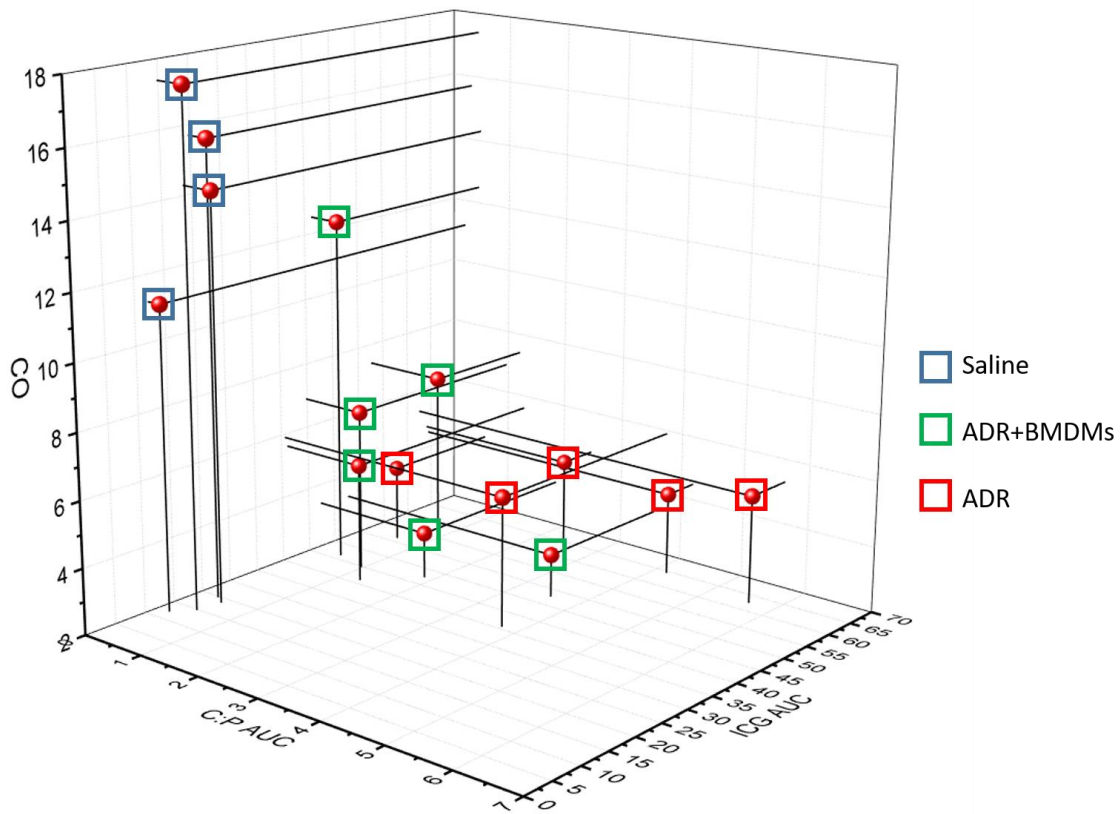

664  
665

666 **Supplementary Figure 3:-** 3D dot plot showing the relationship between the change in cardiac output,  
667 C:P AUC and the ICG AUC between days 1 and 4 in saline treated mice (blue boxes), ADR treated mice  
668 (red boxes and mice treated with ADR and BMDMs (green boxes). Each dot represents an individual  
669 mouse

670  
671  
672  
673  
674

675  
676  
677  
678  
679  
680  
681

| Treatment      | Animal | Day 1<br>Cortex: Pelvis<br>AUC | Day 4<br>Cortex: Pelvis<br>AUC | SCr<br>(mg/dl) | BUN<br>(mg/dl) | Day 1 ICG<br>AUC | Day 4 ICG<br>AUC | ALT<br>(U/L) | Fractional<br>Shortening<br>Day 1 | Fractional<br>Shortening<br>Day 4 | Ejection<br>Fraction<br>Day 1 | Ejection<br>Fraction<br>Day 4 | Stroke<br>Volume<br>Day 1 | Stroke<br>Volume<br>Day 4 | Cardiac<br>Output<br>Day 1 | Cardiac<br>Output<br>Day 4 | Change in<br>body<br>weight (%)<br>Day 1 | Change in<br>Body<br>Weight (%)<br>Day 4 |
|----------------|--------|--------------------------------|--------------------------------|----------------|----------------|------------------|------------------|--------------|-----------------------------------|-----------------------------------|-------------------------------|-------------------------------|---------------------------|---------------------------|----------------------------|----------------------------|------------------------------------------|------------------------------------------|
| Saline<br>Only | 1      | 0.3                            | 0.4                            | 2.1            | 26.5           | 17.4             | 14.8             | 91.2         | 11.1                              | 23.0                              | 24.1                          | 46.2                          | 24.1                      | 44.0                      | 8.7                        | 17.4                       | -9.51                                    | -3.87                                    |
|                | 2      | 0.6                            | 0.5                            | 1.7            | 26.6           | 14.4             | 18.6             | 36.5         | 19.3                              | 19.3                              | 39.9                          | 39.9                          | 34.9                      | 34.9                      | 10.5                       | 14.3                       | 0.00                                     | -3.63                                    |
|                | 3      | 0.4                            | 0.3                            | 2.4            | 24.6           | 16.1             | 19.7             | 38.3         | 20.9                              | 23.8                              | 42.7                          | 47.6                          | 38.5                      | 44.1                      | 14.9                       | 15.7                       | 0.39                                     | -1.54                                    |
|                | 4      | 0.5                            | 0.2                            | 1.9            | 21.1           | 10.2             | 12.2             | 58.4         | 16.9                              | 15.2                              | 35.3                          | 32.3                          | 38.0                      | 28.8                      | 14.5                       | 11.2                       | 0.00                                     | -1.10                                    |
| ADR +<br>BMDMs | 5      | 0.2                            | 1.9                            | 1.9            | 44.9           | 24.4             | 42.3             | 348.8        | 17.3                              | 25.2                              | 36.3                          | 51.7                          | 31.7                      | 15.1                      | 11.0                       | 3.4                        | -8.70                                    | -17.00                                   |
|                | 6      | 0.3                            | 1.2                            | 1.2            | 31.3           | 18.1             | 52.6             | 313.9        | 24.6                              | 17.5                              | 49.2                          | 36.9                          | 35.4                      | 24.6                      | 11.5                       | 7.4                        | -5.70                                    | -13.16                                   |
|                | 7      | 0.5                            | 3.6                            | 0.6            | 45.6           | 20.6             | 47.7             | 275.6        | 24.3                              | 11.8                              | 48.4                          | 26.3                          | 46.2                      | 12.8                      | 15.5                       | 3.3                        | -10.85                                   | -22.09                                   |
|                | 8      | 0.5                            | 0.5                            | 1.5            | 32.7           | 25.4             | 41.3             | 70.3         | 21.5                              | 18.1                              | 43.6                          | 37.9                          | 42.6                      | 31.3                      | 15.3                       | 12.5                       | -6.61                                    | -15.56                                   |
|                | 9      | 2.6                            | 1.3                            | 0.6            | 48.4           | 34.4             | 36.1             | 166.5        | 24.3                              | 15.7                              | 48.5                          | 33.9                          | 42.8                      | 17.6                      | 15.5                       | 5.6                        | -11.81                                   | -24.89                                   |
|                | 10     | 0.6                            | 1.0                            | 1.2            | 43.5           | 29.0             | 39.8             | 136.6        | 28.2                              | 26.1                              | 55.0                          | 52.6                          | 40.4                      | 22.3                      | 16.1                       | 6.9                        | -4.37                                    | -19.21                                   |
| ADR            | 11     | 0.3                            | 4.2                            | 1.7            | 47.3           | 27.1             | 64.4             | 200.9        | 21.5                              | 23.4                              | 43.8                          | 48.2                          | 41.4                      | 18.0                      | 14.3                       | 4.5                        | -7.05                                    | -14.54                                   |
|                | 12     | 0.5                            | 2.5                            | 1.2            | 37.5           | 15.6             | 64.1             | 496.6        | 23.4                              | 26.7                              | 52.1                          | 53.7                          | 40.0                      | 18.3                      | 13.6                       | 4.7                        | -10.33                                   | -16.53                                   |
|                | 13     | 0.5                            | 3.7                            | 1.5            | 45.0           | 26.3             | 35.7             | 116.5        | 22.0                              | 21.8                              | 44.0                          | 45.3                          | 47.7                      | 20.5                      | 17.4                       | 5.9                        | -13.18                                   | -21.32                                   |
|                | 14     | 0.6                            | 5.6                            | 0.8            | 43.1           | 45.6             | 62.5             | 389.2        | 22.6                              | 22.6                              | 45.4                          | 47.1                          | 47.5                      | 14.7                      | 19.0                       | 5.3                        | -7.50                                    | -16.25                                   |
|                | 15     | 0.4                            | 0.6                            | 1.4            | 44.3           | 28.1             | 51.3             | 130.0        | 24.8                              | 12.0                              | 49.3                          | 26.8                          | 44.8                      | 12.8                      | 15.6                       | 4.3                        | -10.00                                   | -21.67                                   |

682

683 **Supplementary Table 1:-** Summary of all imaging and biomarker analysis for individual mice
